# Supplementary material for: N, S co-doped porous carbon microtubes with high charge/discharge rates for sodium-ion batteries
Source: Royal Society of Chemistry journal article supplement (doi:10.1039/c9qi00521h), 2019-01-01
Supplement: c9qi00521h1.pdf [file c9qi00521h1.pdf]

## Supporting Information

### **N, S co-doped porous carbon microtubes with high charge/discharge rate for sodium-ion batteries**

Junfeng Li,<sup>a</sup> Lu Han,<sup>a</sup> Dafeng Zhang,<sup>b</sup> Jinliang Li,<sup>c</sup> Ting Lu,<sup>a</sup> Xianghui Wang,<sup>\*a</sup> Likun Pan<sup>\*a</sup>

<sup>a</sup>*Shanghai Key Laboratory of Magnetic Resonance, School of Physics and Materials, East China Normal University, 3663 N. Zhongshan Rd., Shanghai 200062, P.R. China*

*\*Corresponding author: Tel: 86 21 62234132*

*E-mail: [lkpan@phy.ecnu.edu.cn](mailto:lkpan@phy.ecnu.edu.cn) (Likun Pan); [xhwang@phy.ecnu.edu.cn](mailto:xhwang@phy.ecnu.edu.cn) (Xianghui Wang)*

<sup>b</sup>*School of Materials Science and Engineering, Liaocheng University, Liaocheng, Shandong 252000, P.R. China*

<sup>c</sup>*Siyuan Laboratory, Guangdong Provincial Engineering Technology Research center of Vacuum coating Technologies and New Energy Materials, Department of Physics, Jinan University, Guangzhou 510632, P.R. China*

Table S1 Specific surface areas, pore volumes and mean pore diameters of SNCT-1 and SNCT-2 and SNCT-3

measured by BET method.

| Sample | Specific surface area<br>(m <sup>2</sup> g <sup>-1</sup> ) | Pore volume<br>(cm <sup>3</sup> g <sup>-1</sup> ) | Mean pore diameter<br>(nm) |
|--------|------------------------------------------------------------|---------------------------------------------------|----------------------------|
| SNCT-1 | 219.3                                                      | 0.382                                             | 3.408                      |
| SNCT-2 | 504.8                                                      | 0.59                                              | 3.827                      |
| SNCT-3 | 338.4                                                      | 0.25                                              | 3.822                      |

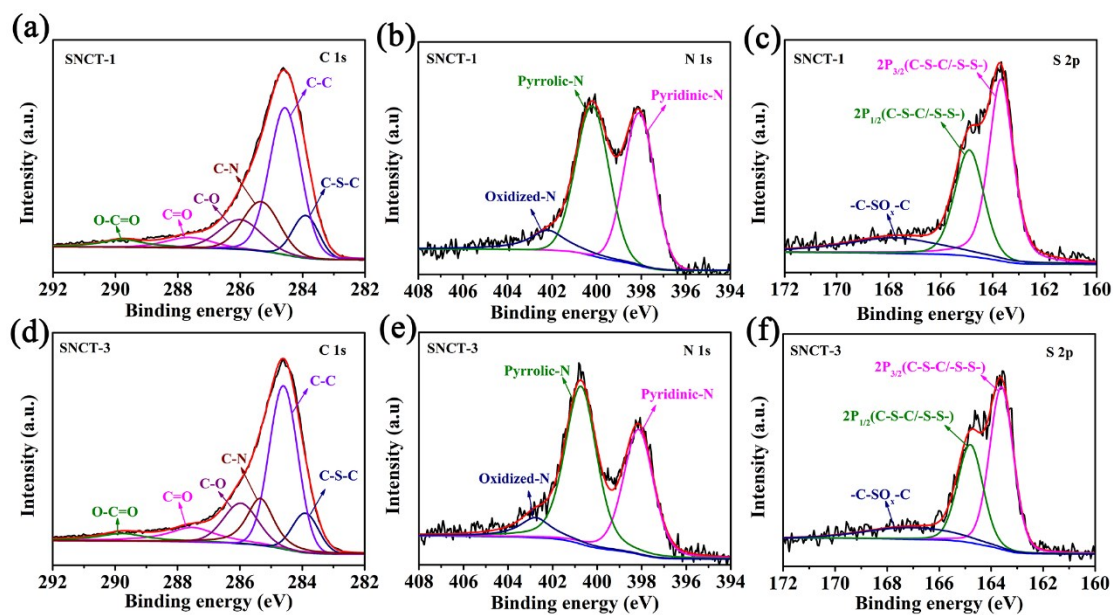

Fig. S1 XPS (a) C 1s, (b) N 1s and (c) S 2p spectra of SNCT-1. XPS (d) C 1s, (e) N 1s and (f) S 2p spectra of SNCT-3.

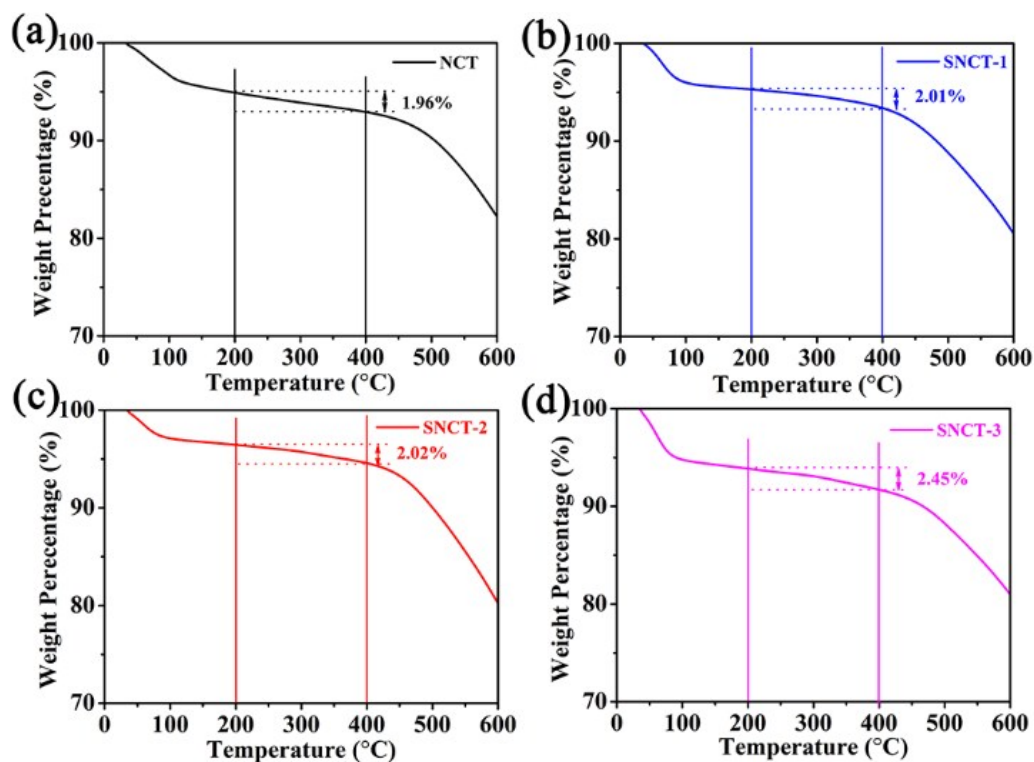

Fig. S2 TGA curves (a) NCT, (b) SNCT-1, (c) SNCT-2 and (d) SNCT-3 under nitrogen atmosphere at a heating rate of  $10^{\circ}\text{C min}^{-1}$ .

Table S2 Elemental contents (wt.%) in SNCT determined by EA measurement.

| Sample | Elemental content (wt.%) |       |      |      |
|--------|--------------------------|-------|------|------|
|        | C                        | N     | S    | H    |
| SNCT-1 | 67.31                    | 14.97 | 3.08 | 2.26 |
| SNCT-2 | 65.78                    | 12.39 | 4.69 | 1.54 |
| SNCT-3 | 72.05                    | 10.20 | 4.80 | 1.55 |

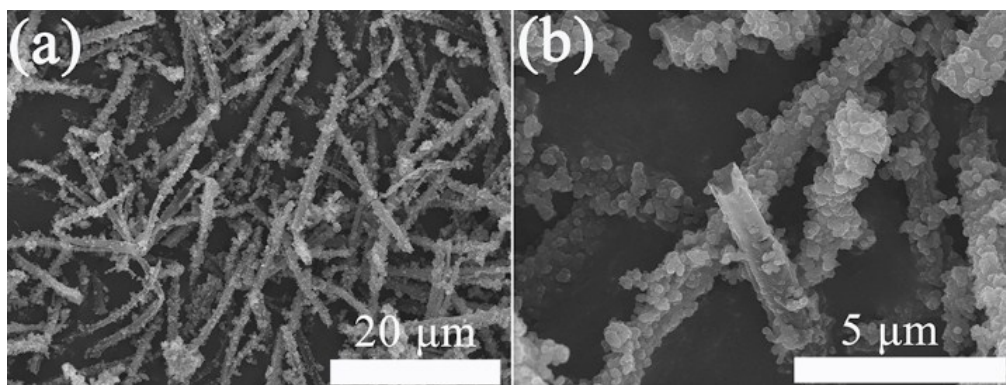

Fig. S3 FESEM images of (a, b) PPy precursor at different magnifications.

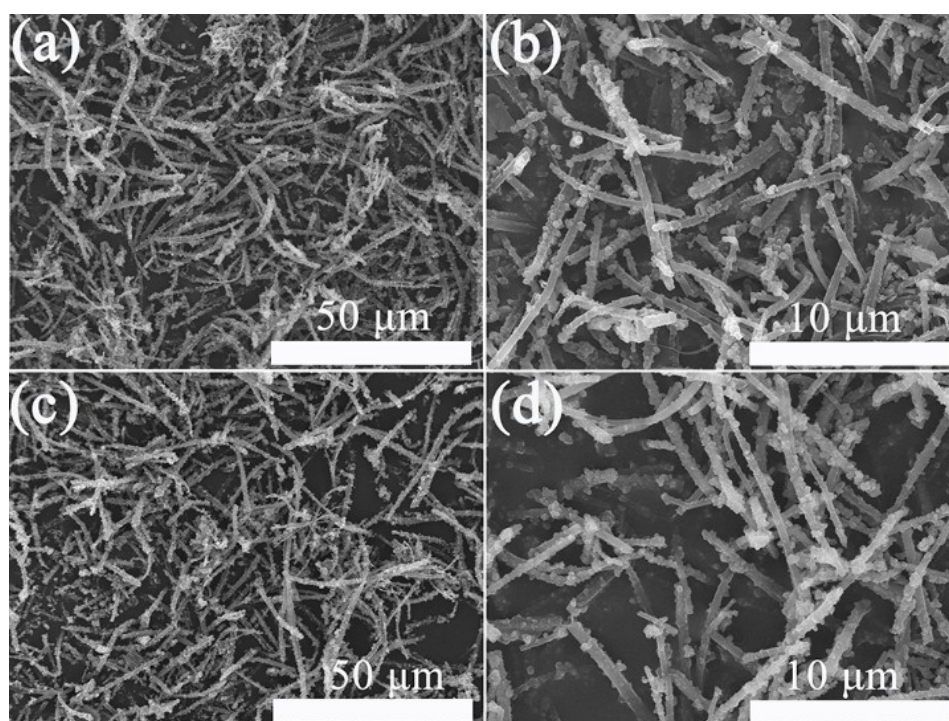

Fig.S4 FESEM images of (a, b) SNCT-1 and (c, d) SNCT-3 at different magnifications.

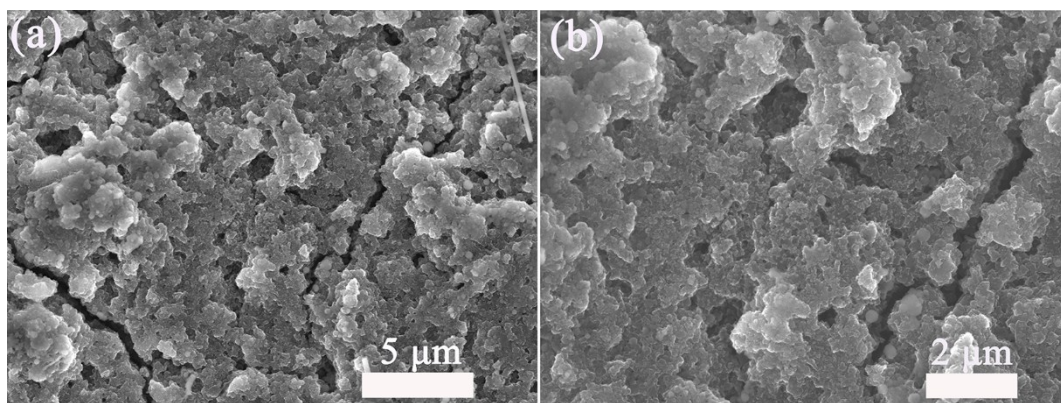

Fig. S5 FESEM images of (a, b) SNCT-2 electrode after the first cycle at different magnifications.

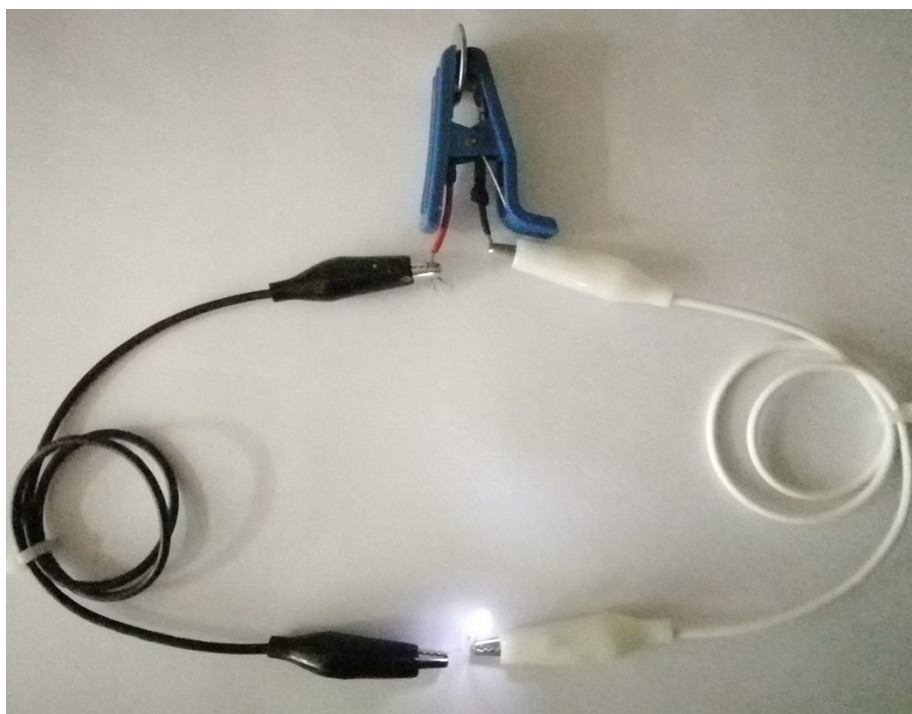

Fig. S6 Photo of white LED bulb lighted up by  $\text{Na}_3\text{V}_2(\text{PO}_4)_3$ //SNCT-2 full cell SIB.
